# Supplementary material for: HDAC turnover, CtIP acetylation and dysregulated DNA damage signaling in colon cancer cells treated with sulforaphane and related dietary isothiocyanates
Source: PubMed Central journal article supplement — Epigenetics. 2013 Apr 26;8(6):612–23. doi: 10.4161/epi.24710 (PMC3857341; doi:10.4161/epi.24710), 2013-04-26

## **Supplemental Material to:**

**Praveen Rajendran, Ariam Kidane, Tian-Wei Yu,  
Wan-Mohaiza Dashwood, William Bisson, Christiane Löhr,  
Emily Ho, David A. Williams and Rod Dashwood**

**HDAC turnover, CtIP acetylation, and dysregulated DNA  
damage signaling in colon cancer cells treated with  
sulforaphane and related dietary isothiocyanates**

**Epigenetics 2013; 8(5)**

**<http://dx.doi.org/10.4161/epi.24710>**

**[http://www.landesbioscience.com/journals/epigenetics/  
article/24710/](http://www.landesbioscience.com/journals/epigenetics/article/24710/)**

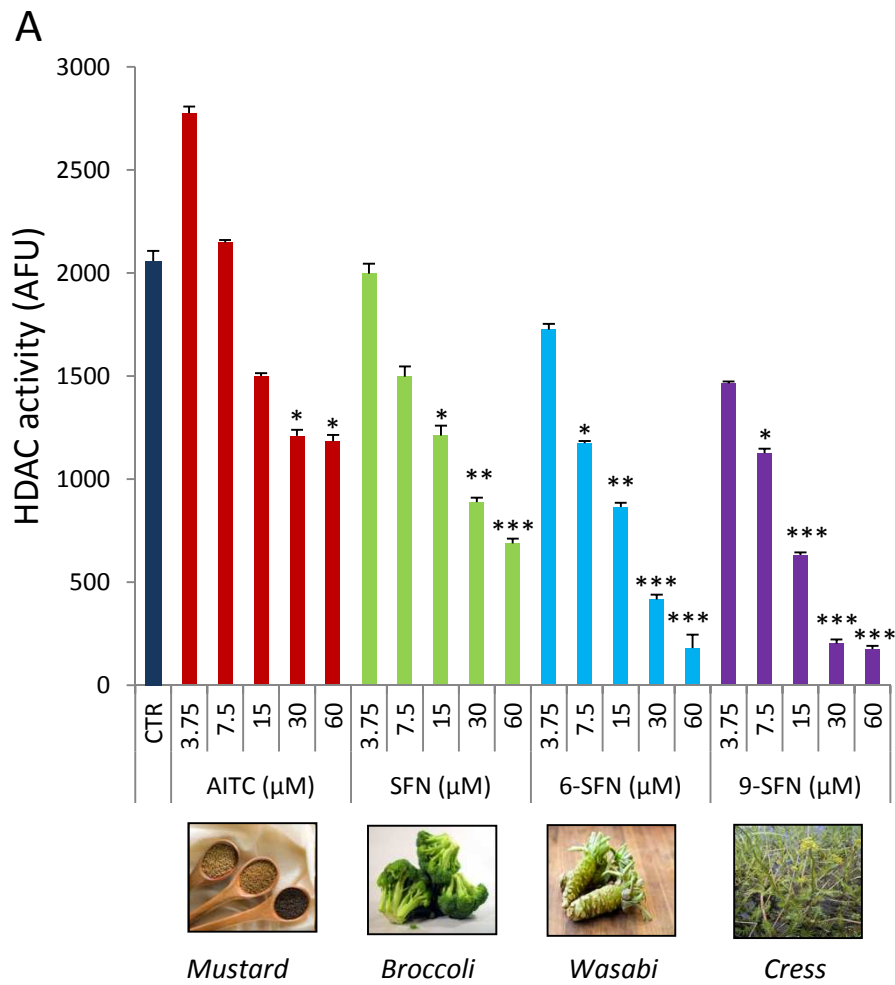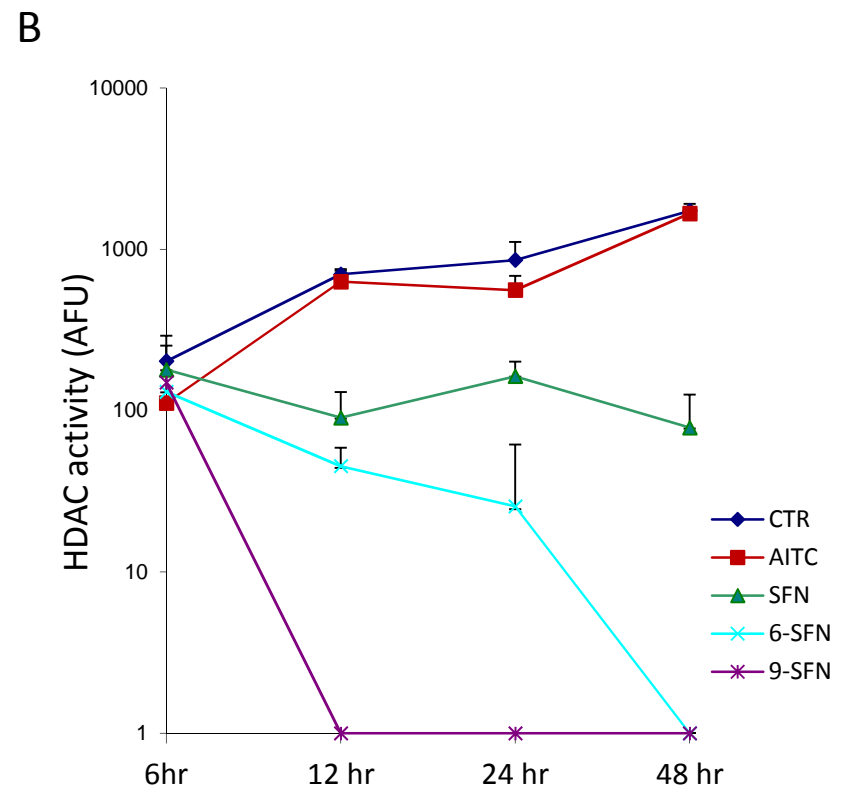

Supplementary Figure 1

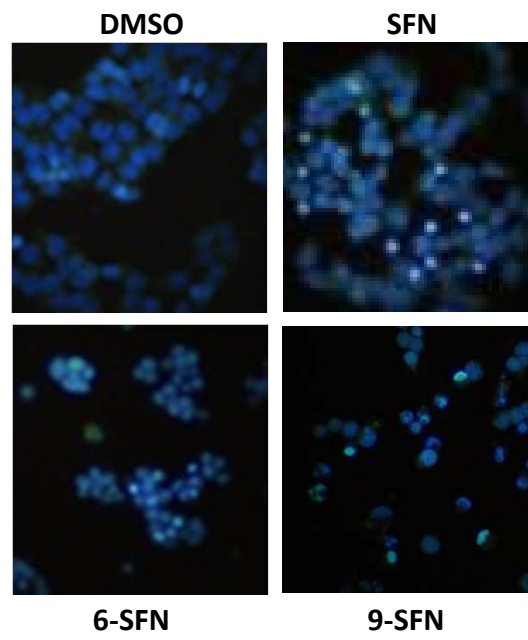

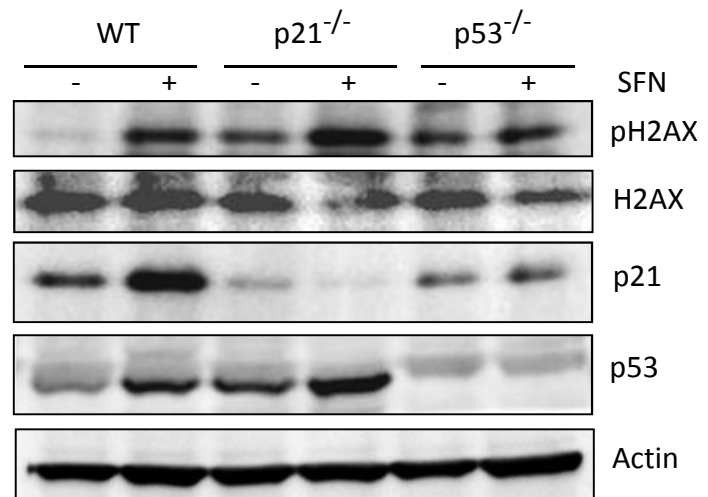

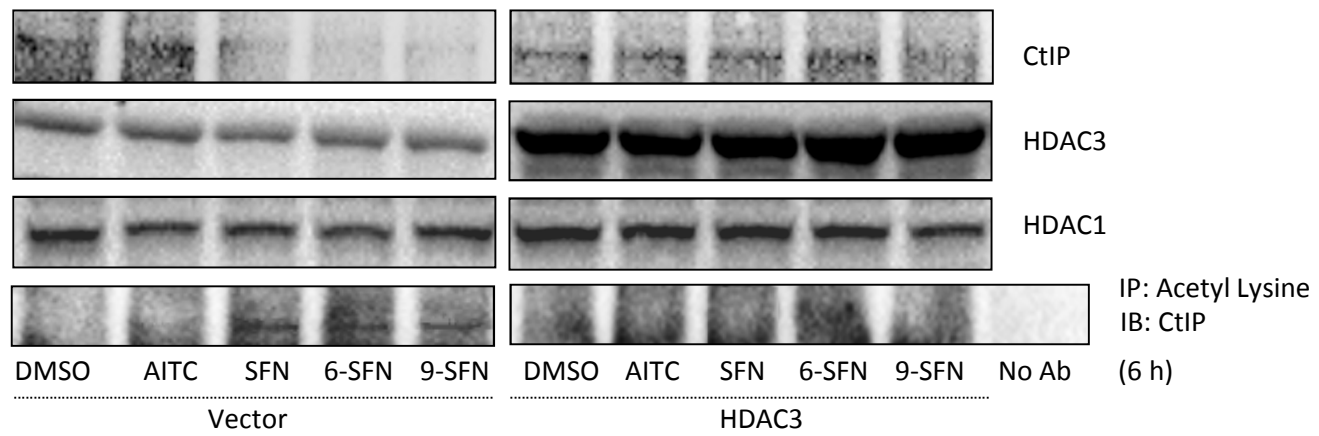

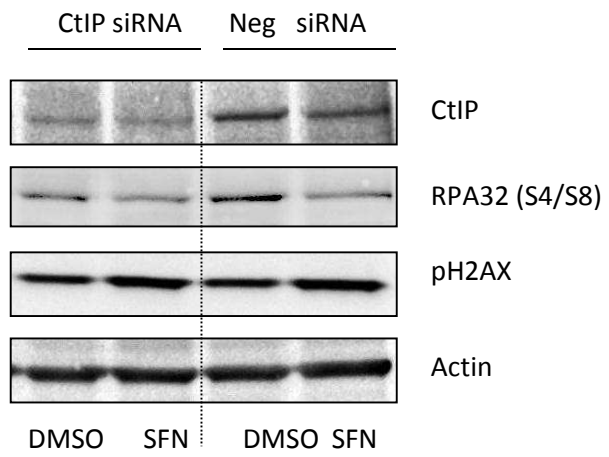

Supplementary Figure 5

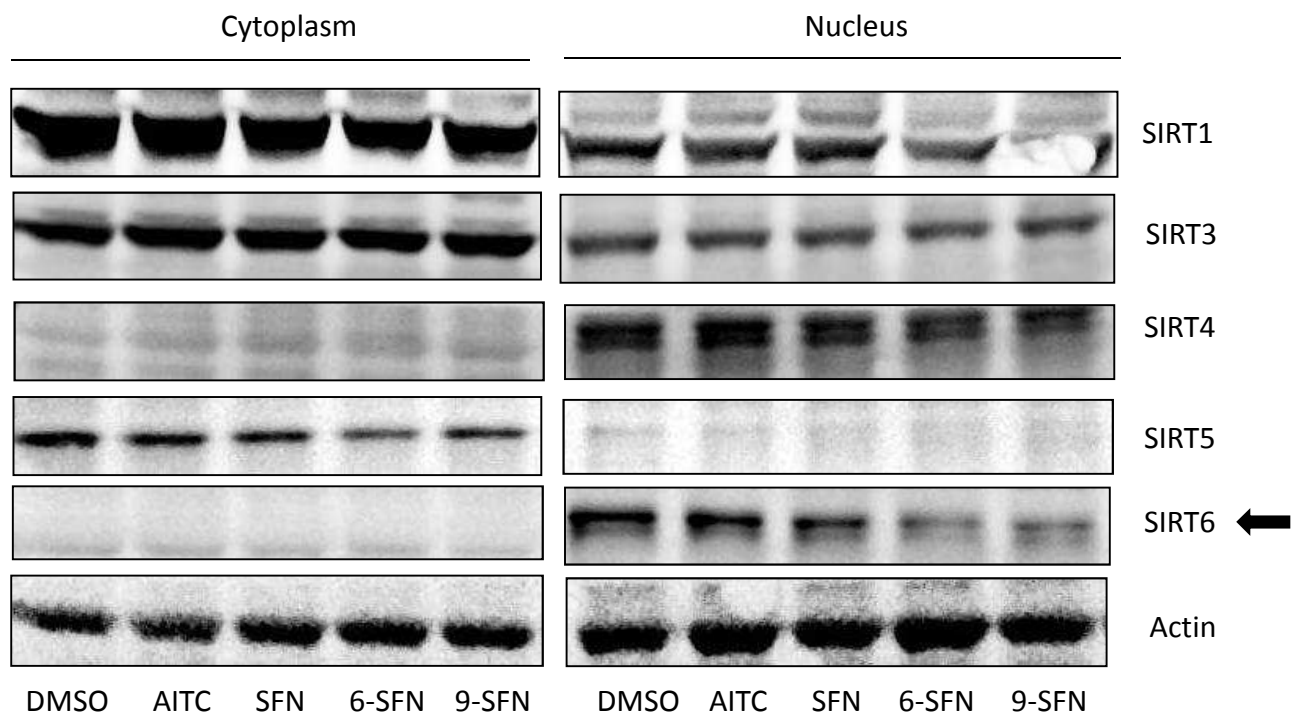

Supplementary Figure 6

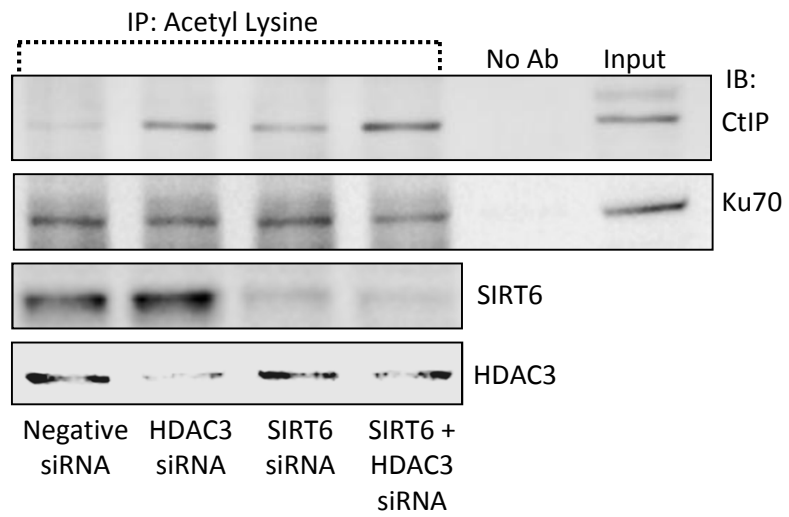



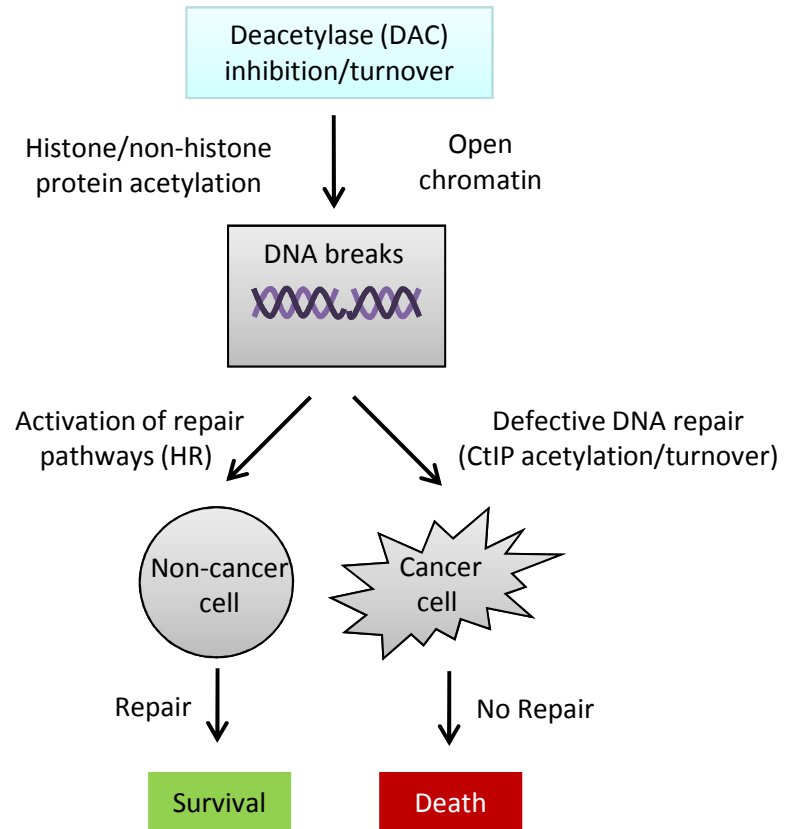

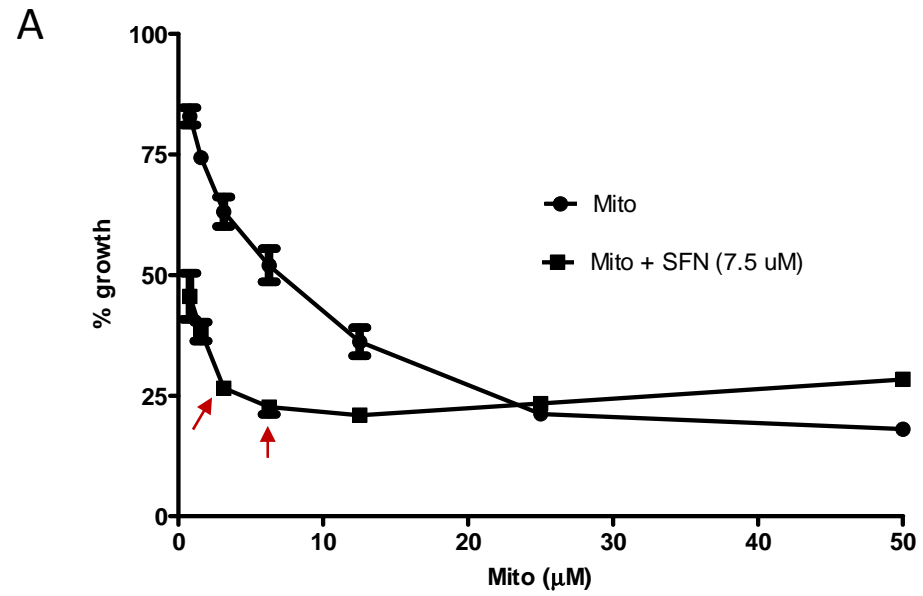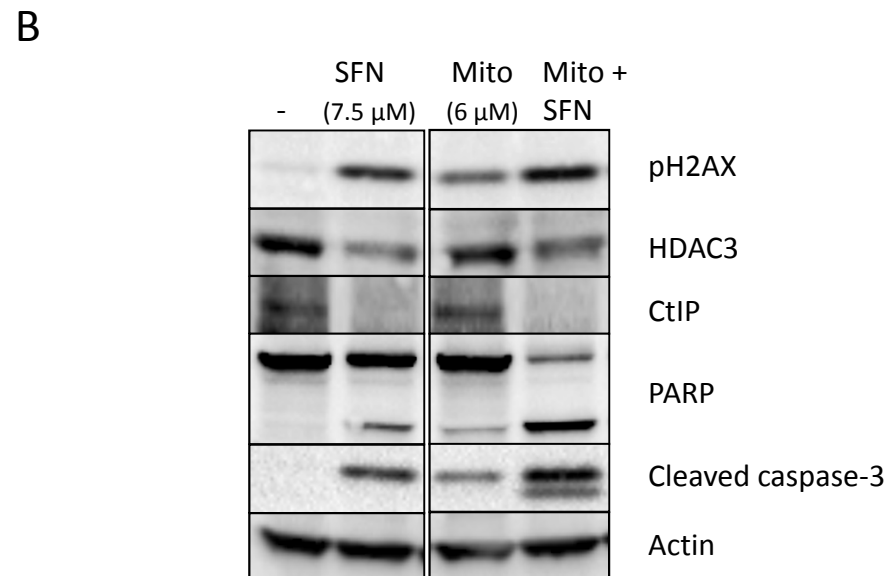

Supplement: epi-8-612-s01.pdf [file epi-8-612-s01.pdf]
